# Supplementary material for: Estimating methane emissions in the Arctic nations using surface observations from 2008 to 2019
Source: Copernicus journal article supplement (doi:10.5194/acp-23-6457-2023), 2023-06-13
Supplement: Supplementary file 1 [file acp-23-6457-2023-supplement.pdf]

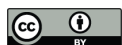

*Supplement of*

## **Estimating methane emissions in the Arctic nations using surface observations from 2008 to 2019**

**Sophie Wittig et al.**

*Correspondence to:* Antoine Berchet ([antoine.berchet@lsce.ipsl.fr](mailto:antoine.berchet@lsce.ipsl.fr))

The copyright of individual parts of the supplement might differ from the article licence.

**Table S1.** Selected atmospheric observation sites for this study, by decreasing latitudes. "Environmental characteristics" gives a brief description of the surrounding of each station.

| ID  | Site, country         | Latitude | Longitude | Elevation (masl)/<br>Intake height (magl) | Time Period | Environmental characteristics                        |
|-----|-----------------------|----------|-----------|-------------------------------------------|-------------|------------------------------------------------------|
| ALT | Alert, CAN            | 82.5 °N  | 62.5 °W   | 185/5                                     | from 1988   | snow covered cliffs, sparse polar desert vegetation  |
| ZEP | Zeppelin, NOR         | 78.9 °N  | 11.9 °E   | 474/5                                     | from 1994   | mountains and glaciers, small village                |
| SUM | Summit, GRL           | 72.6 °N  | 38.4 °E   | 3210/5                                    | from 1997   | year-round dry snow and ice                          |
| TIK | Tiksi, RUS            | 71.9 °N  | 128.9 °E  | 19/10                                     | from 2010   | Lena river delta                                     |
| BRW | Barrow, USA           | 71.3 °N  | 156.6 °W  | 11/3                                      | from 1986   | thermokarst lakes                                    |
| CBY | Cambridge Bay, CAN    | 69.1 °N  | 105.1 °W  | 35/12                                     | from 2012   | largest port of the Northwest Passage                |
| INK | Inuvik, CAN           | 68.3 °N  | 133.5 °W  | 113/10                                    | from 2012   | Arctic Tundra, Mackenzie Delta channel               |
| PAL | Pallas, FIN           | 68.0 °N  | 24.1 °E   | 565/5                                     | from 2004   | wetlands, lakes and patches of forest                |
| CRV | CARVE, USA            | 65.0 °N  | 147.6 °W  | 611/32                                    | 2015 – 2016 | evergreen forest, shrubland and woody wetlands       |
| BLK | Baker Lake, CAN       | 64.3 °N  | 96.0 °W   | 95/10                                     | from 2017   | Arctic Tundra, small lakes                           |
| NOY | Noyabrsk, RUS         | 63.4 °N  | 75.8 °E   | 100/43                                    | 2005 – 2018 | taiga forest, wetlands                               |
| ICE | Storhovdi Island, ISL | 63.4 °N  | 20.2 °E   | 118/5                                     | from 1992   | grassy slopes and coastal cliffs                     |
| IGR | Igrim, RUS            | 63.2 °N  | 64.4 °E   | 25/47                                     | 2005 – 2013 | 10.000 inhabitant town, wetlands                     |
| BCK | Behchoko, CAN         | 62.8 °N  | 115.9 °W  | 160/60                                    | from 2010   | mixed forests, lakes and ponds                       |
| YAK | Yakutsk, RUS          | 62.1 °N  | 129.4 °E  | 130/70                                    | 2007 – 2013 | taiga                                                |
| DEM | Demyanskoe, RUS       | 59.8 °N  | 70.9 °E   | 75/63                                     | 2007 – 2013 | taiga forest surrounded by wetlands                  |
| FNE | Fort Nelson, CAN      | 58.8 °N  | 122.6 °W  | 361/15                                    | from 2014   | boreal forest, southern fringes of permafrost region |
| CHU | Churchill, CAN        | 58.7 °N  | 93.8 °W   | 29/60                                     | from 2011   | Arctic Tundra, boreal wetlands                       |
| KRS | Karasevoe, RUS        | 58.3 °N  | 82.4 °E   | 50/67                                     | 2005 – 2018 | taiga forest, wetlands                               |
| BRZ | Berezorechka, RUS     | 56.1 °N  | 112.5 °E  | 150/80                                    | 2008 – 2017 | taiga, boreal forest                                 |
| CBA | Cold Bay, USA         | 55.2 °N  | 162.7 °E  | 21/4                                      | from 1983   | wet tundra                                           |
| LLB | Lac La Biche, CAN     | 55.0 °N  | 112.5 °W  | 540/50                                    | from 2007   | peatlands and forest                                 |
| AZV | Azovo, RUS            | 54.7 °N  | 73.0 °E   | 100/50                                    | 2009 – 2018 | steppe, large city                                   |
| VGN | Vaganovo, RUS         | 54.5 °N  | 62.3 °E   | 200/85                                    | 2008 – 2018 | steppe, large city                                   |
| ETL | East Trout Lake, CAN  | 54.3 °N  | 105.0 °W  | 500/105                                   | from 2005   | close to the southern edge of boreal forest          |
| MHD | Mace Head, IRL        | 53.3 °N  | 9.9 °W    | 5/5                                       | from 1991   | boggy, small hills covered with grasses and sedges   |
| SHM | Shemya Island, USA    | 52.7 °N  | 174.1 °W  | 23/3                                      | from 1985   | small remote island in Bering Sea                    |
| EST | Esther, CAN           | 51.7 °N  | 110.2 °W  | 707/50                                    | from 2005   | open prairie and cattle ranches                      |

| ID  | Site, country       | Latitude | Longitude | Elevation (masl)/<br>Sampling height (magl) |             | Time Period                                       | Environmental characteristics |
|-----|---------------------|----------|-----------|---------------------------------------------|-------------|---------------------------------------------------|-------------------------------|
|     |                     |          |           |                                             |             |                                                   |                               |
| SVV | Savvushka, RUS      | 51.3 °N  | 82.1 °E   | 400/52                                      | 2014        | steppe, small village                             |                               |
| BRA | Bratt's Lake, CAN   | 50.2 °N  | 104.7 °W  | 595/35                                      | from 2009   | prairie, very flat topography                     |                               |
| FRD | Fraserdale, CAN     | 49.9 °N  | 81.6 °W   | 210/40                                      | from 1990   | boreal forest, extensive wetland coverage         |                               |
| CPS | Chapais, CAN        | 49.8 °N  | 75.0 °W   | 391/40                                      | from 2011   | boreal forest, many lakes in surrounding area     |                               |
| CHB | Chibougamau, CAN    | 49.7 °N  | 74.3 °W   | 393/30                                      | 2007 – 2011 | boreal forest, many lakes in surrounding area     |                               |
| ESP | Estevan Point, CAN  | 49.4 °N  | 126.5 °W  | 7/40                                        | from 2009   | surrounded by forests, Pacific Ocean to the west  |                               |
| ABT | Abbotsford, CAN     | 49.0 °N  | 122.3 °W  | 40/33                                       | from 2014   | close to Pacific Ocean, proximity to large cities |                               |
| EGB | Egbert, CAN         | 44.2 °N  | 79.8 °W   | 251/25                                      | from 2005   | mixed woodland, small rural village               |                               |
| WSA | Sable Island, CAN   | 43.9 °N  | 60.0 °W   | 5/30                                        | from 2003   | remote island, grass and low-growing vegetation   |                               |
| DWN | Downsview, CAN      | 43.8 °N  | 79.5 °W   | 198/20                                      | from 2003   | urban site (Toronto)                              |                               |
| HNP | Hanlan's Point, CAN | 43.6 °N  | 79.4 °W   | 87/10                                       | from 2014   | urban site (Toronto Island, Lake Ontario)         |                               |
| TKP | Turkey Point, CAN   | 42.6 °N  | 80.6 °W   | 231/35                                      | from 2012   | mixed woodlands, close to Lake Erie               |                               |

**Table S2.** *Yearly traces of sensitivity and influence matrices.*

| <b>Year</b> | $tr(\mathbf{HK})/tr(\mathbf{KH})$ | $tr(\mathbf{KH}_{emis})$ | $tr(\mathbf{KH}_{back})$ | <b>Number of observations</b> |
|-------------|-----------------------------------|--------------------------|--------------------------|-------------------------------|
| 2008        | 154.29                            | 15.31                    | 139.00                   | 217                           |
| 2009        | 167.72                            | 17.07                    | 150.65                   | 250                           |
| 2010        | 196.27                            | 21.66                    | 174.61                   | 298                           |
| 2011        | 210.05                            | 25.78                    | 184.27                   | 318                           |
| 2012        | 216.00                            | 27.32                    | 188.68                   | 334                           |
| 2013        | 200.35                            | 24.80                    | 175.55                   | 323                           |
| 2014        | 212.31                            | 31.33                    | 180.98                   | 362                           |
| 2015        | 222.30                            | 32.33                    | 189.97                   | 379                           |
| 2016        | 229.98                            | 29.69                    | 200.29                   | 378                           |
| 2017        | 227.34                            | 29.05                    | 198.29                   | 367                           |
| 2018        | 250.87                            | 28.87                    | 222.00                   | 384                           |
| 2019        | 185.69                            | 20.86                    | 164.83                   | 266                           |

**Table S3.** Prior and Posterior emissions from different sectors in North America (NA), East Eurasia (EE), West Eurasia (WE) and the Arctic (AR). Note that the posterior results as well as the prior uncertainties only refer to one specific configuration of the ensemble of posterior states ( $\mathbf{x}_{\max}^a$ ).

| Sector        | Prior     |           |         |           | Posterior |           |         |           |
|---------------|-----------|-----------|---------|-----------|-----------|-----------|---------|-----------|
|               | NA        | EE        | WE      | AR        | NA        | EE        | WE      | AR        |
| Wetlands      | 30.4±26.1 | 13.8±11.9 | 3.3±2.9 | 13.2±11.4 | 18.8±13.0 | 12.2±9.5  | 3.2±2.7 | 9.8±7.9   |
| Other natural | 5.5±4.1   | 6.0±4.6   | 1.1±0.9 | 6.1±4.7   | 5.1±3.8   | 5.7±4.3   | 1.1±0.9 | 5.8±4.4   |
| Anthropogenic | 6.8±4.6   | 16.1±10.9 | 4.6±3.1 | 3.8±2.5   | 7.0±4.6   | 16.1±10.7 | 4.6±3.1 | 3.7±2.4   |
| Total         | 42.6±34.8 | 35.9±27.3 | 9.0±6.8 | 23.1±18.5 | 30.8±21.4 | 34.1±24.6 | 8.9±6.6 | 19.4±14.8 |

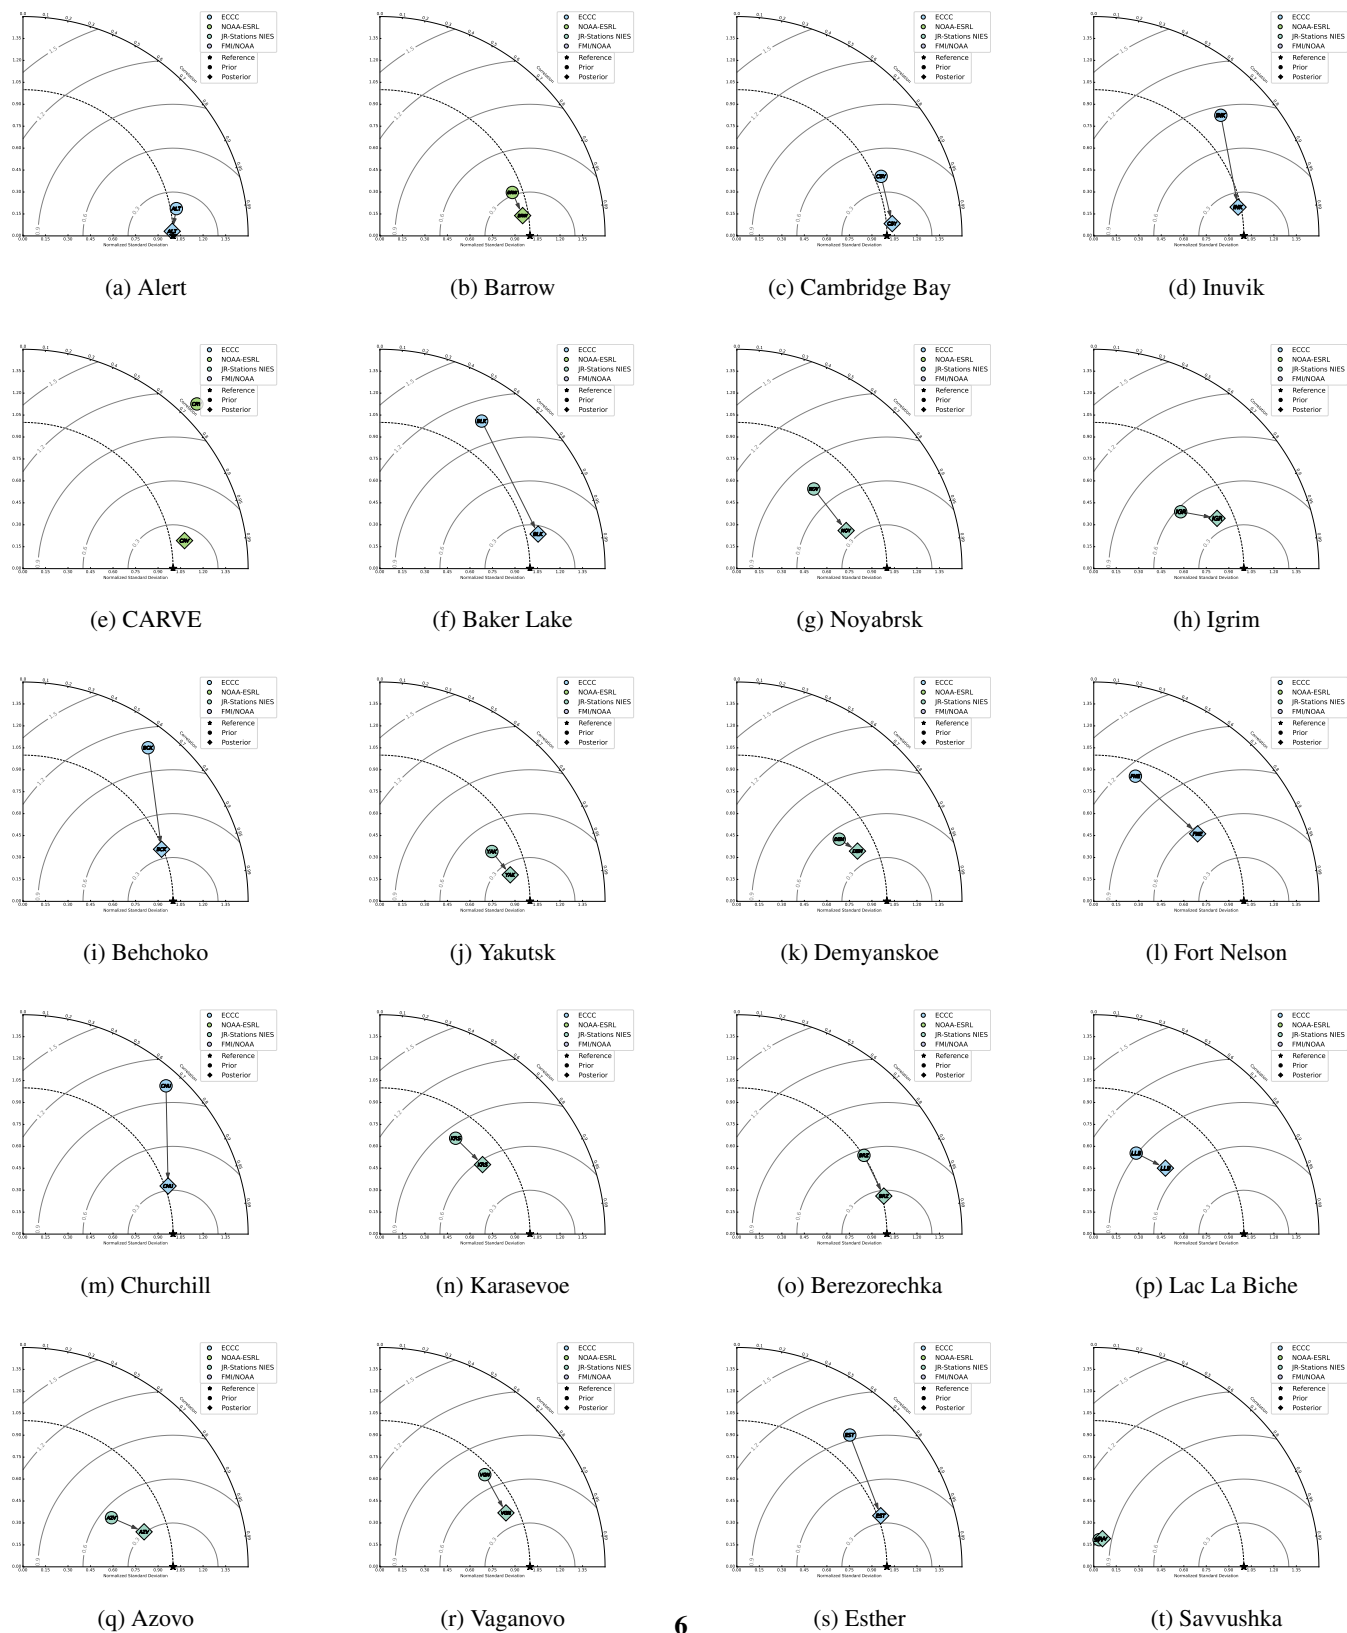

**Figure S1.** Exemplary Taylor diagrams of different observation sites.

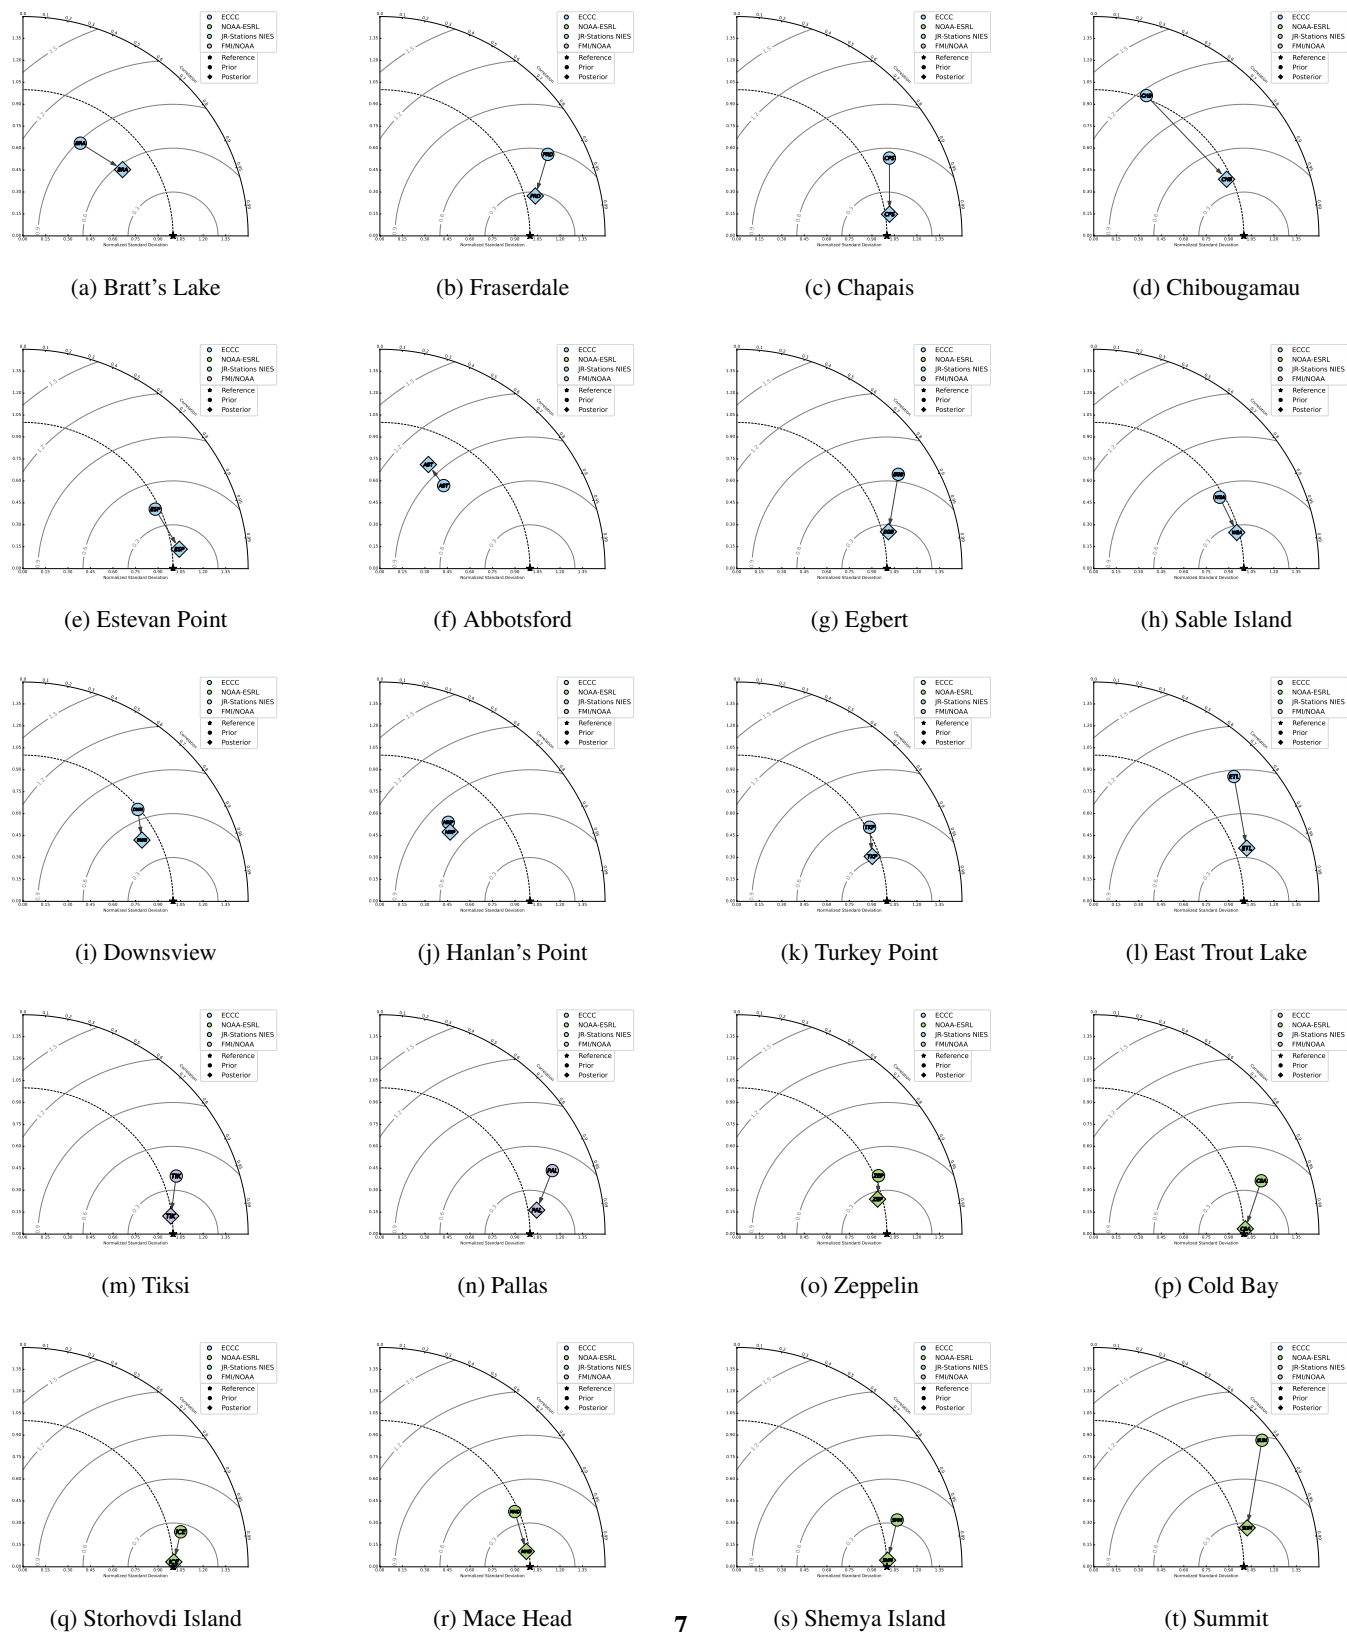

**Figure S2.** Exemplary Taylor diagrams of different observation sites.

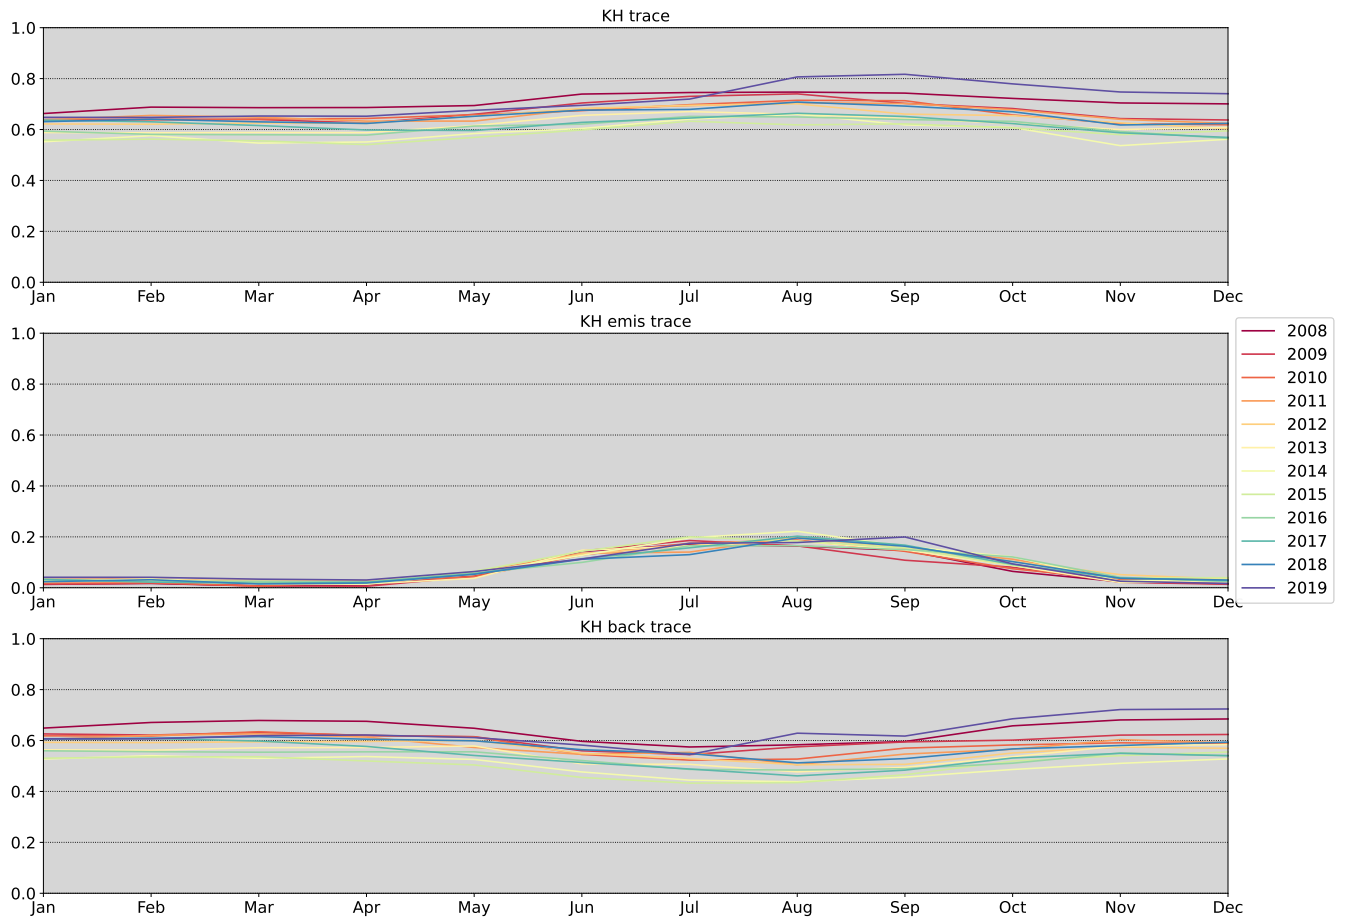

**Figure S3.** Seasonal variation of  $tr(\mathbf{KH})$  for all years from 2008 to 2019. The monthly traces are divided by the number of available observations for the corresponding month.



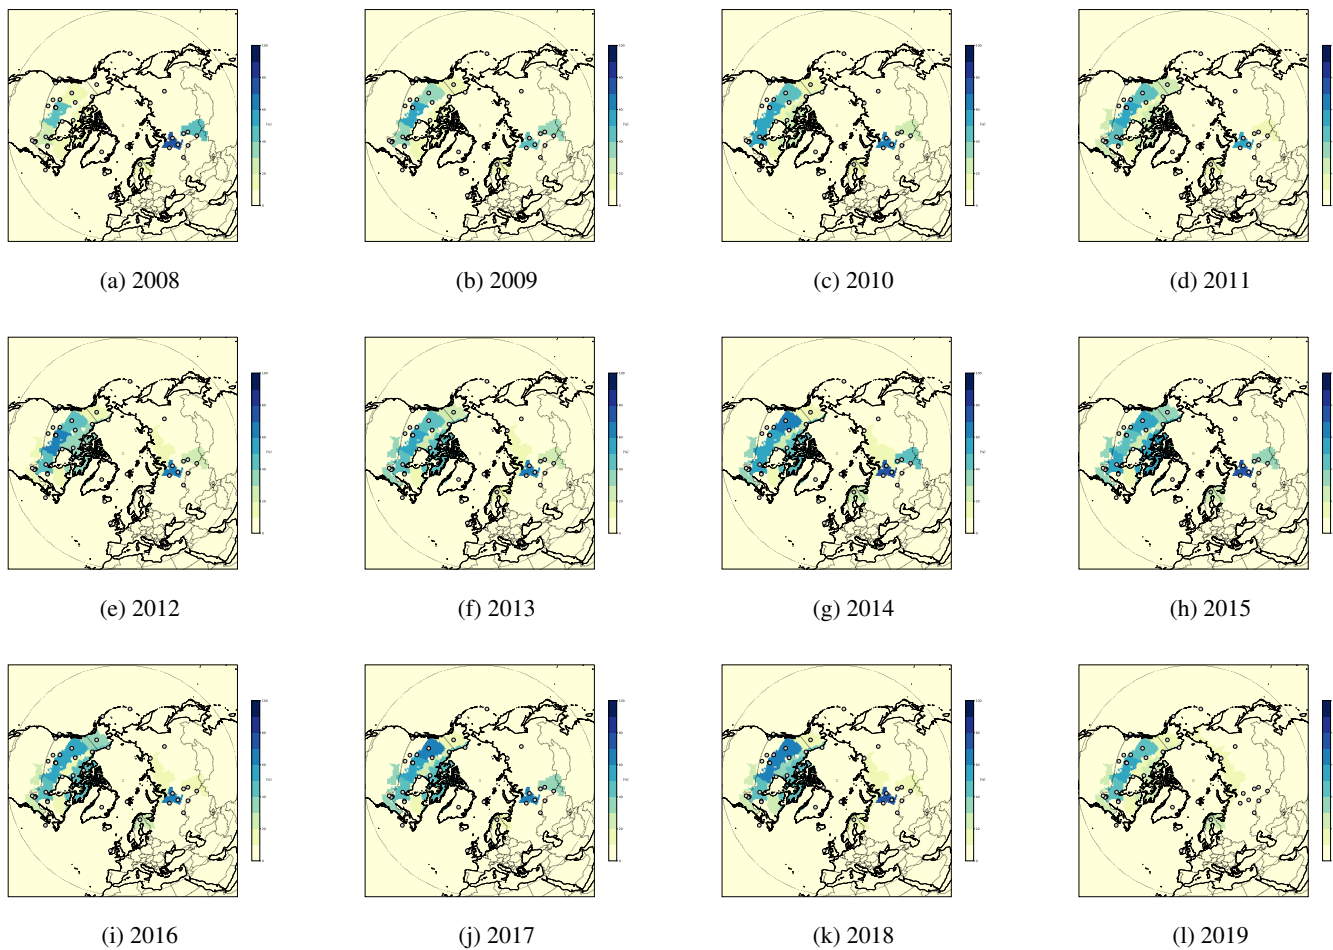

**Figure S4.** Regional constraints on wetland emissions as derived from the influence matrix  $\mathbf{KH}$ . Darker areas thereby indicate higher constraints. The percentages of the areas refer to the corresponding summed elements of  $\mathbf{KH}$ . The observation sites are marked as grey circles.

**Table S4.** Share of total modelled CH<sub>4</sub> mixing ratios from background and combined methane sources and sink. The values show the average over the whole period of monthly mixing ratios and, respectively, only over the summer and winter months.

| Station ID | Background |      |       |        |      |        |      | Source contribution |     |       |        |     |        |     |
|------------|------------|------|-------|--------|------|--------|------|---------------------|-----|-------|--------|-----|--------|-----|
|            | Total      |      | SD    | Summer |      | Winter |      | Total               |     | SD    | Summer |     | Winter |     |
|            | [ppb]      | [%]  | [ppb] | [ppb]  | [%]  | [ppb]  | [%]  | [ppb]               | [%] | [ppb] | [ppb]  | [%] | [ppb]  | [%] |
| ALT        | 1907.1     | 99.7 | 16.6  | 1884.1 | 99.7 | 1922.8 | 99.6 | 6.0                 | 0.3 | 2.8   | 5.1    | 0.3 | 8.2    | 0.4 |
| ZEP        | 1912.3     | 99.9 | 18.9  | 1886.6 | 99.9 | 1931.3 | 99.8 | 2.8                 | 0.1 | 1.3   | 2.1    | 0.1 | 4.1    | 0.2 |
| SUM        | 1902.5     | 99.9 | 24.2  | 1880.2 | 99.9 | 1918.5 | 99.9 | 2.4                 | 0.1 | 1.1   | 2.7    | 0.1 | 2.1    | 0.1 |
| TIK        | 1916.5     | 98.4 | 20.7  | 1890.6 | 98.0 | 1938.5 | 98.6 | 30.6                | 1.6 | 10.4  | 39.3   | 2.0 | 26.9   | 1.4 |
| BRW        | 1908.1     | 99.0 | 16.7  | 1885.7 | 98.8 | 1923.8 | 99.1 | 19.5                | 1.0 | 8.6   | 22.4   | 1.2 | 18.2   | 0.9 |
| CBY        | 1908.6     | 99.4 | 16.0  | 1887.6 | 99.2 | 1924.5 | 99.5 | 12.0                | 0.6 | 9.4   | 15.3   | 0.8 | 8.9    | 0.5 |
| INK        | 1905.6     | 98.6 | 14.7  | 1886.7 | 97.8 | 1918.3 | 99.1 | 28.1                | 1.4 | 20.7  | 42.0   | 2.2 | 17.3   | 0.9 |
| PAL        | 1910.8     | 98.8 | 18.4  | 1887.5 | 98.8 | 1929.8 | 98.5 | 23.8                | 1.2 | 10.4  | 23.8   | 1.2 | 29.4   | 1.5 |
| CRV        | 1897.5     | 99.3 | 16.1  | 1876.7 | 98.7 | 1907.6 | 99.7 | 13.2                | 0.7 | 10.2  | 24.6   | 1.3 | 6.3    | 0.3 |
| BLK        | 1908.4     | 99.2 | 14.9  | 1889.6 | 98.9 | 1923.3 | 99.6 | 14.6                | 0.8 | 13.7  | 20.2   | 1.1 | 7.7    | 0.4 |
| NOY        | 1925.3     | 95.1 | 26.5  | 1895.6 | 93.2 | 1957.3 | 95.5 | 99.4                | 4.9 | 39.2  | 139.3  | 6.8 | 93.1   | 4.5 |
| ICE        | 1907.3     | 99.9 | 15.6  | 1885.8 | 99.9 | 1921.7 | 99.9 | 2.7                 | 0.1 | 1.2   | 2.5    | 0.1 | 2.8    | 0.1 |
| IGR        | 1923.7     | 97.8 | 26.5  | 1893.6 | 97.8 | 1955.0 | 97.1 | 43.4                | 2.2 | 17.7  | 43.4   | 2.2 | 58.8   | 2.9 |
| BCK        | 1905.2     | 98.4 | 15.2  | 1887.4 | 97.3 | 1920.5 | 99.3 | 31.6                | 1.6 | 29.0  | 53.2   | 2.7 | 13.2   | 0.7 |
| YAK        | 1918.1     | 98.9 | 22.1  | 1892.9 | 98.9 | 1943.7 | 98.5 | 22.2                | 1.1 | 8.2   | 22.0   | 1.1 | 29.7   | 1.5 |
| DEM        | 1924.8     | 96.1 | 25.9  | 1896.9 | 94.3 | 1955.9 | 96.4 | 79.3                | 3.9 | 31.0  | 115.4  | 5.7 | 73.5   | 3.6 |
| FNE        | 1893.2     | 98.6 | 16.6  | 1874.5 | 98.1 | 1904.2 | 98.9 | 26.3                | 1.4 | 15.1  | 36.5   | 1.9 | 20.3   | 1.1 |
| CHU        | 1908.1     | 98.6 | 13.3  | 1892.4 | 97.5 | 1921.3 | 99.6 | 27.1                | 1.4 | 28.2  | 49.4   | 2.5 | 7.8    | 0.4 |
| KRS        | 1926.3     | 97.1 | 25.2  | 1901.8 | 96.1 | 1956.7 | 96.9 | 58                  | 2.9 | 20.3  | 77.8   | 3.9 | 63.1   | 3.1 |
| BRZ        | 1925.4     | 97.4 | 23.9  | 1903.7 | 97.4 | 1954.1 | 96.7 | 50.6                | 2.6 | 15.0  | 50.8   | 2.6 | 67.3   | 3.3 |
| CBA        | 1903.4     | 99.9 | 21.0  | 1873.2 | 99.9 | 1919.7 | 99.9 | 1.5                 | 0.1 | 0.6   | 1.6    | 0.1 | 1.4    | 0.1 |
| LLB        | 1894.7     | 97.8 | 15.5  | 1878.2 | 96.8 | 1905.5 | 98.1 | 43.0                | 2.2 | 20.4  | 62.2   | 3.2 | 37.5   | 1.9 |
| AZV        | 1925.3     | 97.8 | 25.1  | 1901.1 | 97.7 | 1956.9 | 97.0 | 43.8                | 2.2 | 13.7  | 43.9   | 2.3 | 60.0   | 3.0 |
| VGN        | 1920.6     | 98.1 | 22.7  | 1896.1 | 98.5 | 1947.5 | 97.2 | 37.3                | 1.9 | 13.7  | 29.4   | 1.5 | 55.6   | 2.8 |
| ETL        | 1901.6     | 97.8 | 14.2  | 1886.3 | 96.2 | 1915.1 | 98.7 | 43.2                | 2.2 | 27.0  | 74.0   | 3.8 | 25.6   | 1.3 |
| MHD        | 1904.5     | 99.9 | 14.7  | 1884.5 | 99.9 | 1916.7 | 99.9 | 2.4                 | 0.1 | 1.0   | 2.4    | 0.1 | 2.1    | 0.1 |
| SHM        | 1906.1     | 99.9 | 22.7  | 1873.2 | 99.9 | 1924.2 | 99.9 | 1.6                 | 0.1 | 0.6   | 1.4    | 0.1 | 1.8    | 0.1 |
| EST        | 1893.9     | 99.1 | 14.9  | 1875.4 | 97.9 | 1907.1 | 99.8 | 17.9                | 0.9 | 20.2  | 40.6   | 2.1 | 4.5    | 0.2 |

| Station ID | Background |      |       |        |      |        |      | Source contribution |     |       |        |     |        |     |
|------------|------------|------|-------|--------|------|--------|------|---------------------|-----|-------|--------|-----|--------|-----|
|            | Total      |      | SD    | Summer |      | Winter |      | Total               |     | SD    | Summer |     | Winter |     |
|            | [ppb]      | [%]  | [ppb] | [ppb]  | [%]  | [ppb]  | [%]  | [ppb]               | [%] | [ppb] | [ppb]  | [%] | [ppb]  | [%] |
| <b>SVV</b> | 1918.8     | 97.6 | 19.7  | 1903.0 | 96.2 | 1941.4 | 97.6 | 48.2                | 2.4 | 23.1  | 74.7   | 3.8 | 47.3   | 2.4 |
| <b>BRA</b> | 1897.4     | 99.1 | 14.8  | 1880.2 | 98.0 | 1911.5 | 99.8 | 17.5                | 0.9 | 17.5  | 37.9   | 2.0 | 4.0    | 0.2 |
| <b>FRD</b> | 1901.8     | 99.4 | 17.6  | 1892.4 | 98.9 | 1916.4 | 99.8 | 11.9                | 0.6 | 11.6  | 21.6   | 1.1 | 3.4    | 0.2 |
| <b>CPS</b> | 1908.1     | 99.3 | 11.3  | 1898.8 | 98.8 | 1917.9 | 99.8 | 12.6                | 0.7 | 12.8  | 22.8   | 1.2 | 3.2    | 0.2 |
| <b>CHB</b> | 1907.9     | 99.3 | 11.2  | 1898.7 | 98.8 | 1917.6 | 99.8 | 12.6                | 0.7 | 12.8  | 23.0   | 1.2 | 3.2    | 0.2 |
| <b>ESP</b> | 1887.1     | 99.4 | 15.2  | 1864.7 | 98.7 | 1895.9 | 99.7 | 11.4                | 0.6 | 10.3  | 25.5   | 1.3 | 6.0    | 0.3 |
| <b>ABT</b> | 1884.8     | 98.8 | 14.8  | 1863.0 | 97.9 | 1894.5 | 99.4 | 22.6                | 1.2 | 16.3  | 40.8   | 2.1 | 11.8   | 0.6 |
| <b>EGB</b> | 1906.2     | 98.6 | 11.2  | 1898.3 | 97.3 | 1915.5 | 99.7 | 26.5                | 1.4 | 24.8  | 53.0   | 2.7 | 6.5    | 0.3 |
| <b>WSA</b> | 1901.7     | 99.0 | 11.7  | 1889.3 | 98.4 | 1911.0 | 99.4 | 18.9                | 1.0 | 11.2  | 30.6   | 1.6 | 11.6   | 0.6 |
| <b>DWN</b> | 1905.8     | 96.9 | 11.4  | 1897.4 | 96.0 | 1915.3 | 97.4 | 60.8                | 3.1 | 20.2  | 79.1   | 4.0 | 51.7   | 2.6 |
| <b>HNP</b> | 1905.5     | 96.9 | 11.5  | 1896.9 | 96.0 | 1915.1 | 97.3 | 61.7                | 3.1 | 19.7  | 79.2   | 4.0 | 53.1   | 2.7 |
| <b>TKP</b> | 1904.6     | 97.4 | 11.5  | 1895.5 | 96.6 | 1914.5 | 97.7 | 51.3                | 2.6 | 16.3  | 66.8   | 3.4 | 44.6   | 2.3 |

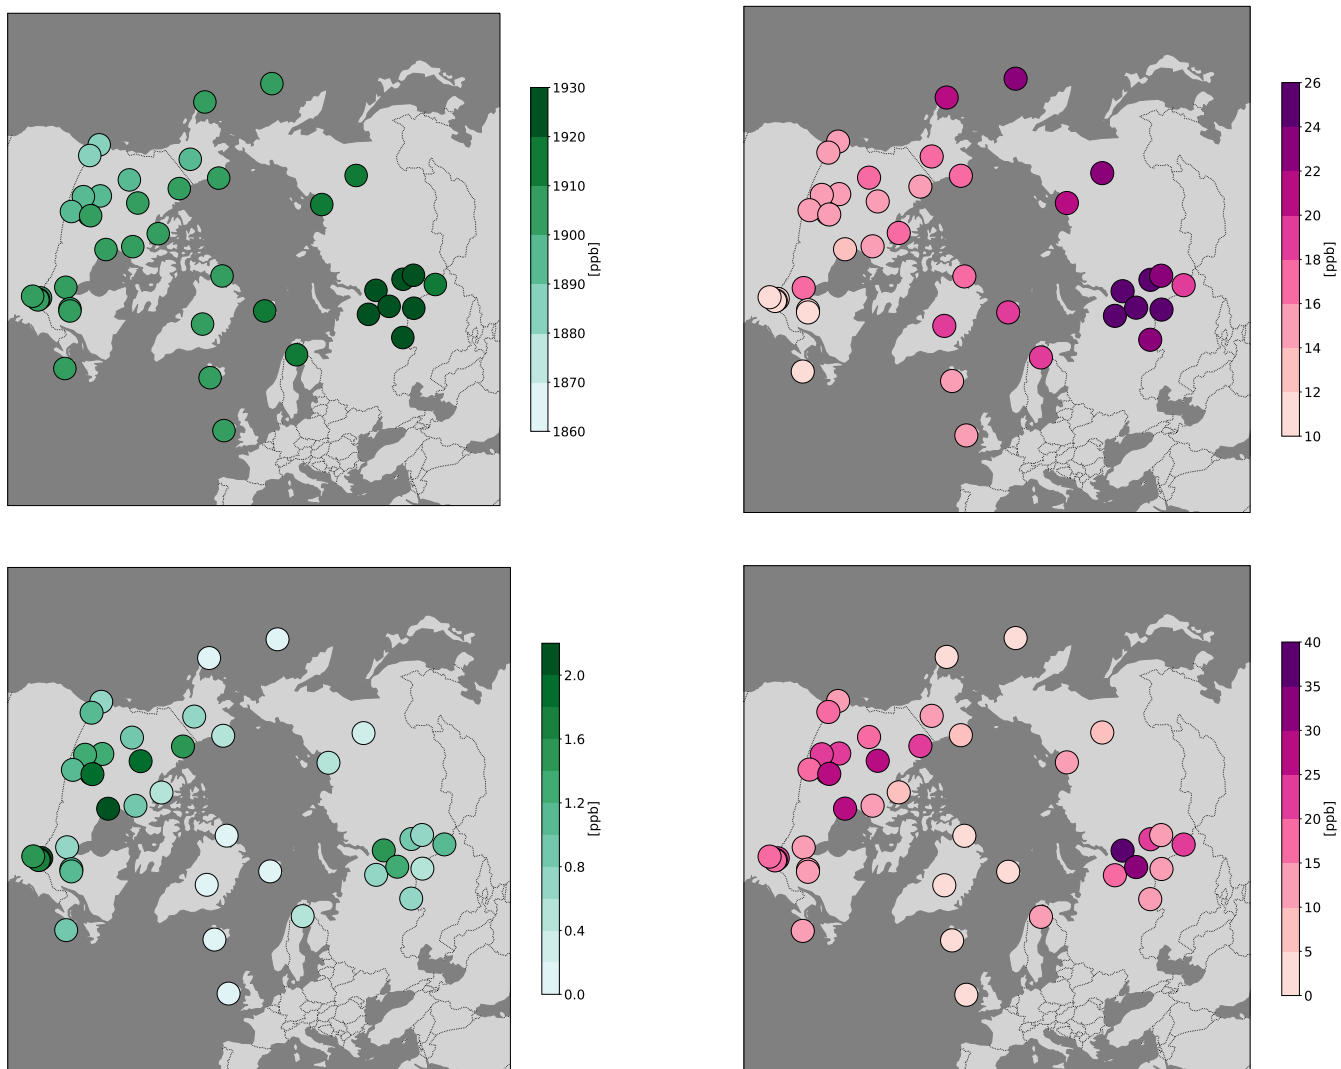

**Figure S5.** Contributions to the total simulated mixing ratio signals at each observation site. Left panels show average contributions, right panels the standard deviations of the contributions for the background (top) and regional emissions (bottom) respectively.
